# Supplementary material
Source: publisher figshare collection journal article supplement (https://sage.figshare.com/ndownloader/files/21050271)
Supplement: Supplementary file 1 [file 21050271]

**Appendix.**

**Inclusion and exclusion criteria based on current procedural terminology (CPT) and international classification of diseases, ninth and tenth revision codes (ICD-9 CM/10 CM codes)**

| **Inclusion** |  |  |
| --- | --- | --- |
|  | **CPT codes** |  |
|  | 22554 | Anterior Arthrodesis |
|  | 22551 | Anterior Cervical Discectomy and Fusion |
|  | **ICD-9CM / ICD-10CM** |  |
|  | 723.4 / M5412, M5413, M5010 | Cervical/Cervicothroacic Radiculopathy |
|  | 722.71 / M5000 | Cervical disc disorder with myelopathy |
|  | 722.91 / M5080, M5090 | Unspecified cervical disc disorder |
|  | 722.0 / M5020 | Cervical disc displacement |
|  | 723.0 / M4802 | Cervical spinal stenosis |
|  | 721.0 / M47812 | Cervical spondylosis |
|  | 722.4 / M5030 | Cervical degenerative disc disease |
|  | 721.1 / M4712 | Cervical Spondylosis with myelopathy |
| **Exclusion** |  |  |
|  | **CPT codes** |  |
|  | 22585, 63076 | Multi-Level ACDF |
|  | 63081, 63082 | Corpectomy |
|  | 63001, 63015, 63050, 63051, 6320, 63045, 62040, 63035, 63048, 63043, 22216, 22236, 22590, 22210, 22220, 222595, 22600, 22614, 63250, 63265, 63270 | Posterior Fusion |
|  | **ICD-9CM /ICD-10CM** |  |
|  | 805.0 - 805.9 / S10-S19 | Trauma |
|  | 952.0 - 952.9 / S34, S34.1, S34.101 –S34.105 | Spinal cord injury |
|  | 140 – 239 / C0 - C96 | Cancer/malignancy |
|  | 001 – 139 / A00 – A99, B00 – B99 | Infection |
